# Supplementary material
Source: MDPI journal article supplement (https://www.mdpi.com/2311-5637/9/7/617)
Supplement: s1 [file s1]

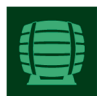

## Supplementary Materials

### Concentrated Manipueira as an Alternative Low-Cost Substrate to *Rhodotorula glutinis* for Biotechnological Production of High Contents of Carotenoids

Felipe de Andrade Maia <sup>1</sup>, Willen Silva Igreja <sup>2</sup>, Ana Augusta Odorissi Xavier <sup>3</sup>, Adriana Zerlotti Mercadante <sup>3</sup>, Alessandra Santos Lopes <sup>1,2</sup> and Renan Campos Chisté <sup>1,2,\*</sup>

<sup>1</sup> Faculty of Food Engineering (FEA), Institute of Technology (ITEC), Federal University of Pará (UFPA), Belém 66075-110, Brazil;

<sup>2</sup> Postgraduate Program of Food Science and Technology (PPGCTA), Institute of Technology (ITEC), Federal University of Pará (UFPA), Belém 66075-110, Brazil;

<sup>3</sup> Department of Food Science and Nutrition, Faculty of Food Engineering, University of Campinas (UNICAMP), São Paulo 13083-862, Brazil;

\* Correspondence: rcchiste@ufpa.br

#### 5,8-epoxy-Lutein – peak 1:

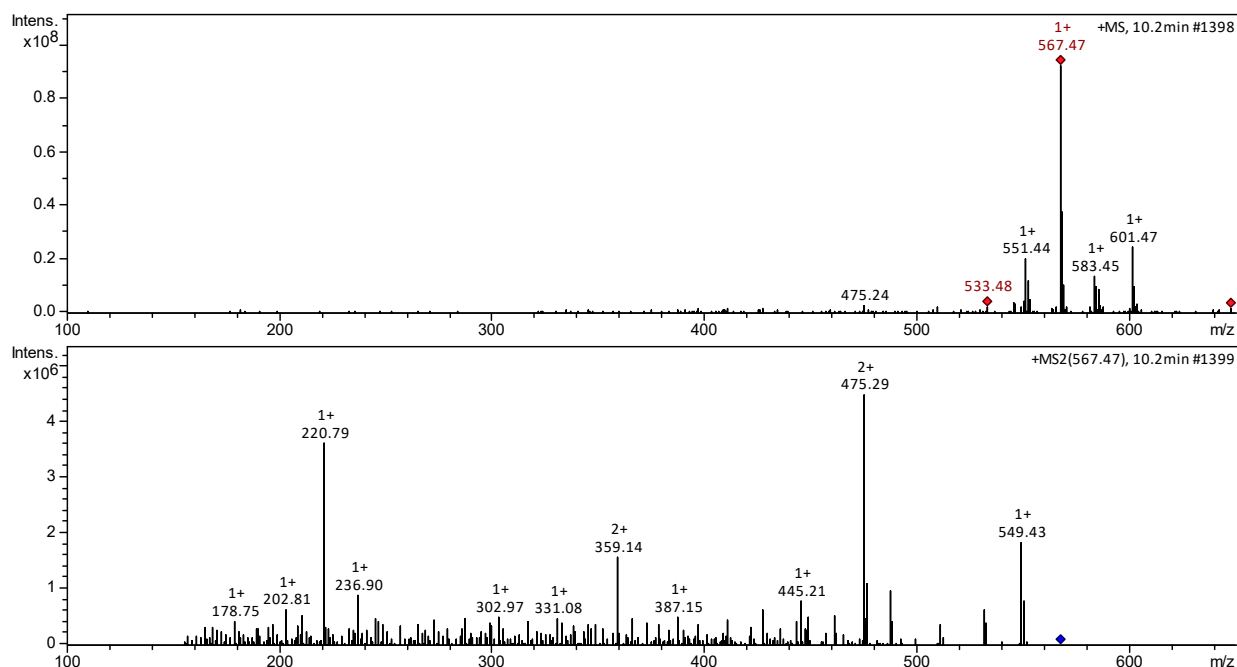

(all-*E*)-Lutein – **peak 2**:

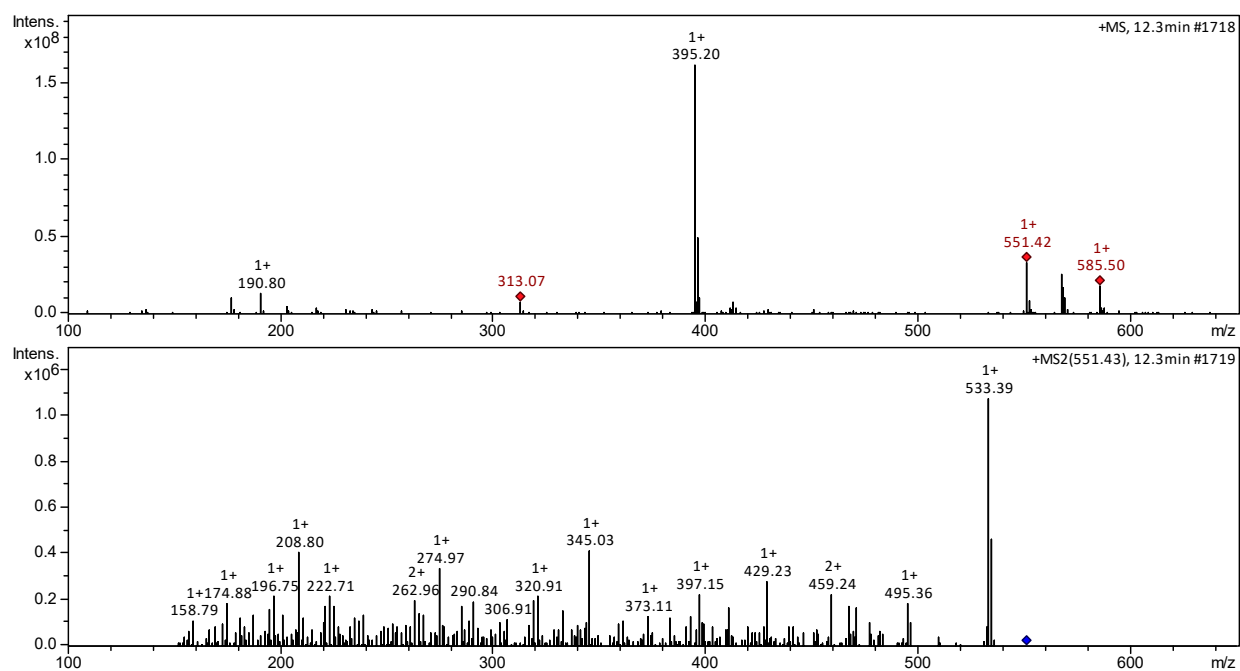

(13*Z*)- $\beta$ -Carotene – **peak 3**:

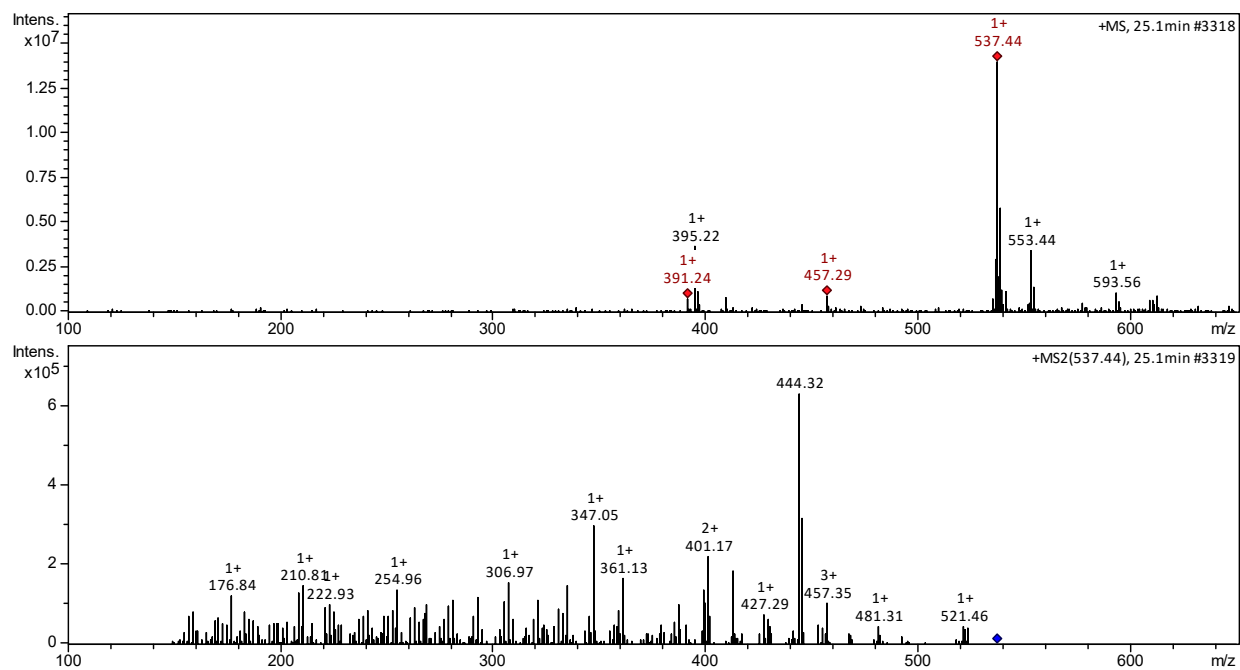

(all-E)- $\beta$ -Carotene – peak 4:

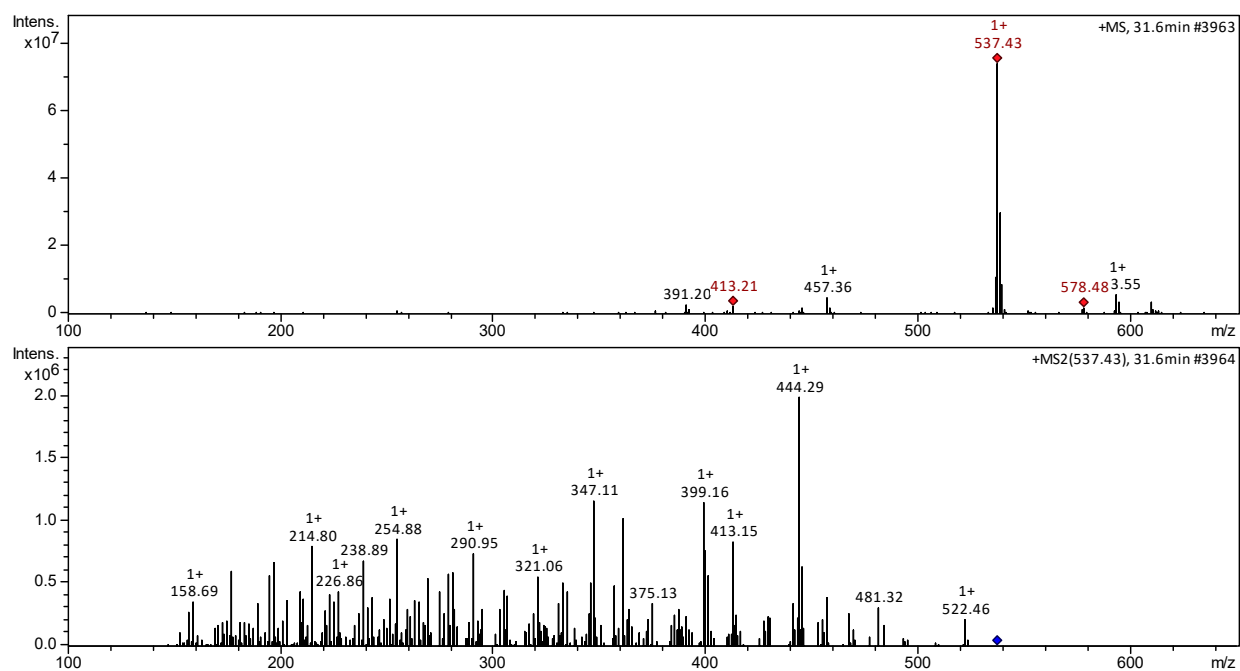

(9Z)- $\beta$ -Carotene – peak 5:

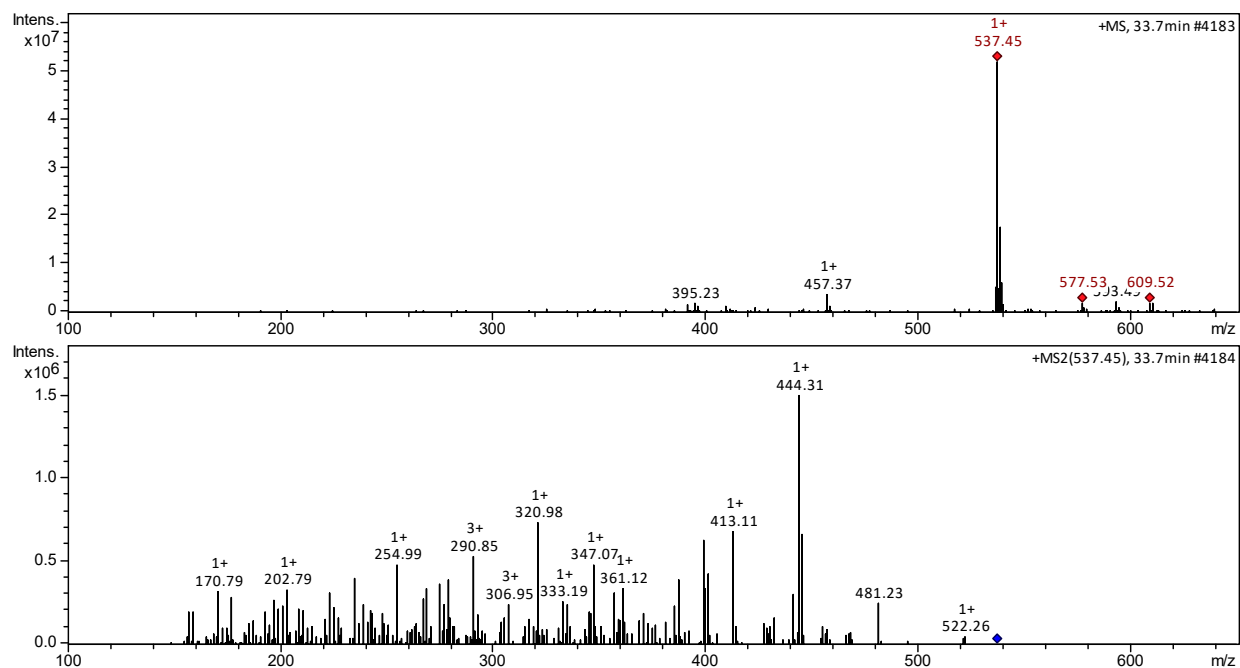

**$\beta$ -Zeacarotene 2 – peak 6:**

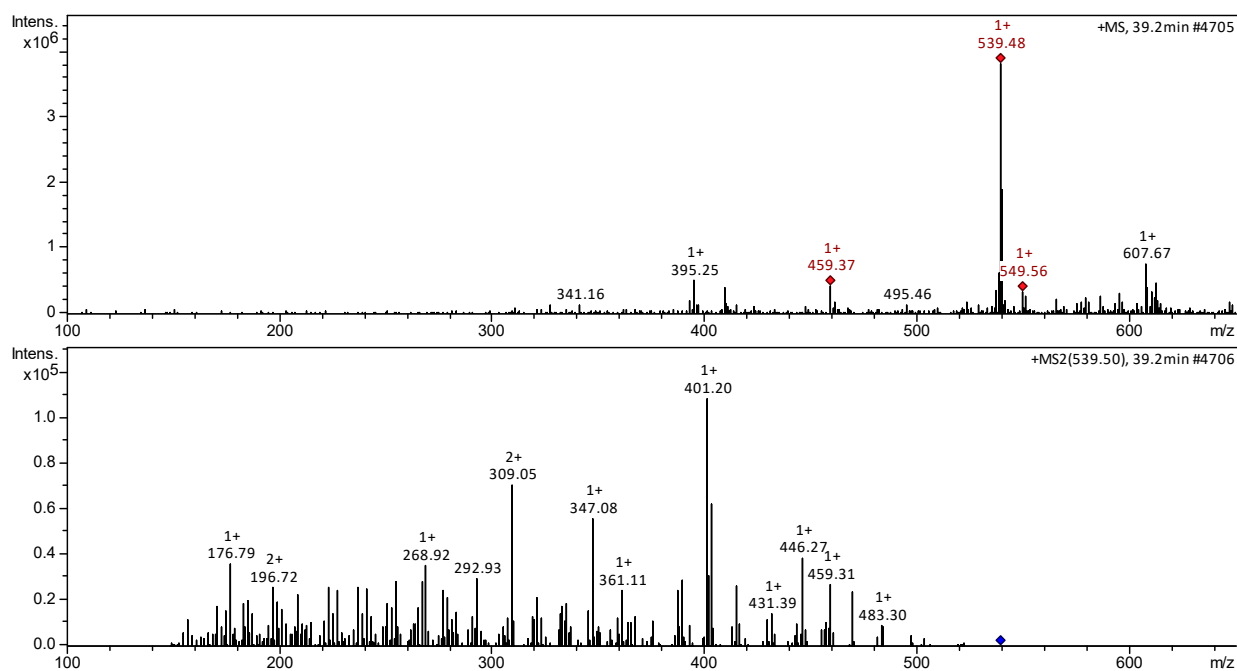

**$\beta$ -Zeacarotene 2 – peak 7:**

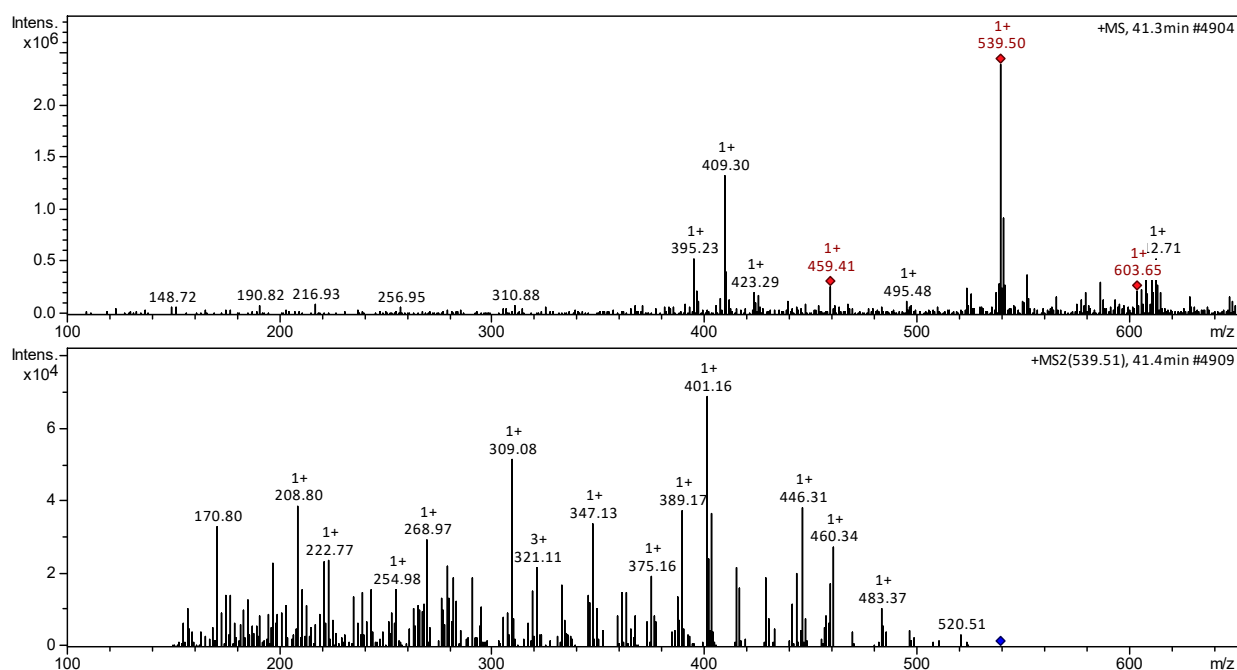

**Supplementary Figure S1.** MS and MS/MS spectra, by HPLC-DAD-APCI-MS/MS, of the carotenoids tentatively identified in the biomass of *Rhodotorula glutinis* cultivated with concentrated *manipueira* as substrate.
